# Supplementary material for: An Fe2O3 nanoparticle-reduced graphene oxide composite for ambient electrocatalytic N2 reduction to NH3
Source: Royal Society of Chemistry journal article supplement (doi:10.1039/c9qi00968j), 2019-01-01
Supplement: c9qi00968j1.pdf [file c9qi00968j1.pdf]

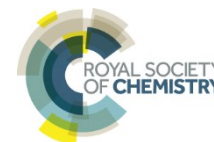

Journal Name

COMMUNICATION

## Fe<sub>2</sub>O<sub>3</sub> nanoparticles-reduced graphene oxide composite for ambient electrocatalytic N<sub>2</sub> reduction to NH<sub>3</sub>

Received 00th January 20xx,  
Accepted 00th January 20xx

Jian Li,<sup>a</sup> Xiaojuan Zhu,<sup>b,c</sup> Ting Wang,<sup>b,c</sup> Yonglan Luo<sup>c</sup> and Xuping Sun<sup>b\*</sup>

DOI: 10.1039/x0xx00000x

www.rsc.org/

**Haber-Bosch process for industrial-scale NH<sub>3</sub> production suffers from harsh reaction conditions with CO<sub>2</sub> emission. Electrochemical N<sub>2</sub> reduction has gained considerable recent interest as an eco-friendly and sustainable alternative for NH<sub>3</sub> synthesis with the aid of efficient electrocatalysts for the N<sub>2</sub> reduction reaction (NRR). Here, Fe<sub>2</sub>O<sub>3</sub> nanoparticles-reduced graphene oxide composite (Fe<sub>2</sub>O<sub>3</sub>-rGO) is reported as an earth-abundant NRR electrocatalyst enabling efficient ambient N<sub>2</sub>-to-NH<sub>3</sub> conversion. In 0.5 M LiClO<sub>4</sub>, this Fe<sub>2</sub>O<sub>3</sub>-rGO attains a large NH<sub>3</sub> yield of 22.13 μg h<sup>-1</sup> mg<sup>-1</sup><sub>cat.</sub> at -0.50 V and a high Faradaic efficiency of 5.89% at -0.40 V (vs. RHE). It also demonstrates high electrochemical stability.**

As an important activated nitrogen feedstock for agricultural fertilizers, NH<sub>3</sub> is key to the growth of the human population and the ecology of the planet.<sup>1</sup> NH<sub>3</sub> has also emerged as an attractive hydrogen energy vector for hydrogen-based economies.<sup>2</sup> As the main current procedure for industrial-scale NH<sub>3</sub> production from atmospheric N<sub>2</sub> and H<sub>2</sub> obtained from fossil fuels, the Haber-Bosch process however operates under harsh reaction conditions, suffering from large energy consumption and heavy serious CO<sub>2</sub> emission.<sup>3</sup>

Electrocatalytic N<sub>2</sub> reduction has received high recent research attention as a carbon-neutral process for ambient N<sub>2</sub>-to-NH<sub>3</sub> fixation, but it requires efficient electrocatalysts for the N<sub>2</sub> reduction reaction (NRR) to break the strong N≡N triple bond of inert N<sub>2</sub> and activate the N<sub>2</sub>.<sup>4-8</sup> Precious metal-based materials show favorable decent NRR activity,<sup>9-12</sup> but they are too expensive for large-scale uses. As such, great effort has been devoted to designing and developing earth-abundant alternatives.<sup>13-39</sup> Among such catalysts, transition metal oxides (TMOs) can be easily obtained on a large scale and thus hold

greater promise as NRR catalysts. Fe is the only element in all three of the known nitrogenases (MoFe-, VFe-, and FeFe-N<sub>2</sub>ase) for biological N<sub>2</sub> fixation,<sup>40</sup> and it also represents one of the cheapest and most abundant metals on the earth.<sup>41</sup> Licht et al. reported using Fe<sub>2</sub>O<sub>3</sub> for efficient N<sub>2</sub> reduction electrocatalysis in a molten hydroxide electrolyte cell at temperatures ≥200 °C.<sup>42</sup> Under ambient conditions, carbon nanotube-supported Fe<sub>2</sub>O<sub>3</sub> nanoparticles as a NRR catalyst only achieves a low Faradaic efficiency (FE) of 0.15%.<sup>43</sup> Although much attention has been paid on Fe oxides to electrocatalyze the NRR,<sup>16,22, 43-46</sup> it is still highly desired to develop such catalyst system with high performances.

In this communication, we report our recent experimental effort toward this direction in developing Fe<sub>2</sub>O<sub>3</sub> nanoparticles-reduced graphene oxide composite (Fe<sub>2</sub>O<sub>3</sub>-rGO) as a low-cost NRR electrocatalyst which enables efficient ambient N<sub>2</sub> reduction to NH<sub>3</sub> without N<sub>2</sub>H<sub>4</sub> by-product. When operated in 0.5 M LiClO<sub>4</sub>, this Fe<sub>2</sub>O<sub>3</sub>-rGO composite is able to achieve a large NH<sub>3</sub> yield of 22.13 μg h<sup>-1</sup> mg<sup>-1</sup><sub>cat.</sub> at -0.50 V vs. reversible hydrogen electrode (RHE) and a high FE of 5.89% at -0.40 V. Notably, it also shows high electrochemical stability.

Fig. 1a shows the X-ray diffraction (XRD) patterns of Fe<sub>2</sub>O<sub>3</sub> and Fe<sub>2</sub>O<sub>3</sub>-rGO (see ESI for preparative details). XRD pattern for Fe<sub>2</sub>O<sub>3</sub> gives peaks characteristic of Fe<sub>2</sub>O<sub>3</sub> phase (JCPDS No. 79-0007). Fe<sub>2</sub>O<sub>3</sub>-rGO also shows peaks characteristic of Fe<sub>2</sub>O<sub>3</sub> without diffraction peaks for rGO, which could be attributed to its low content. Fig. 1b and 1c show the transmission electron microscopy (TEM) images of rGO and Fe<sub>2</sub>O<sub>3</sub>-rGO, respectively, suggesting the uniform distribution of nanoparticles (the diameters ranging from 25 to 50 nm) on the surface of rGO. High-resolution TEM (HRTEM) image taken from such nanoparticle reveals well-resolved lattice fringes with an interplanar distance of 0.269 nm corresponding to the (104) plane of Fe<sub>2</sub>O<sub>3</sub> (Fig. 1d). The energy-dispersive X-ray (EDX) spectrum (Fig. S1) reveals the existence of Fe, O, and C elements with a weight ratios of 0.52:0.5:0.43 in Fe<sub>2</sub>O<sub>3</sub>-rGO. STEM and corresponding EDX mapping images (Fig. 1e) confirm the uniform distribution of Fe, O, and C elements within Fe<sub>2</sub>O<sub>3</sub>-rGO.

<sup>a</sup> School of Economics and Management, University of Electronic Science and Technology of China, Chengdu 611731, Sichuan, China

<sup>b</sup> Institute of Fundamental and Frontier Sciences, University of Electronic Science and Technology of China, Chengdu 610054, Sichuan, China. E-mail: xpsun@uestc.edu.cn

<sup>c</sup> Chemical Synthesis and Pollution Control Key Laboratory of Sichuan Province, College of Chemistry and Chemical Engineering, China West Normal University, Nanchong 637002, Sichuan, China

† Electronic Supplementary Information (ESI) available: Experimental section and supplementary figures. See DOI:

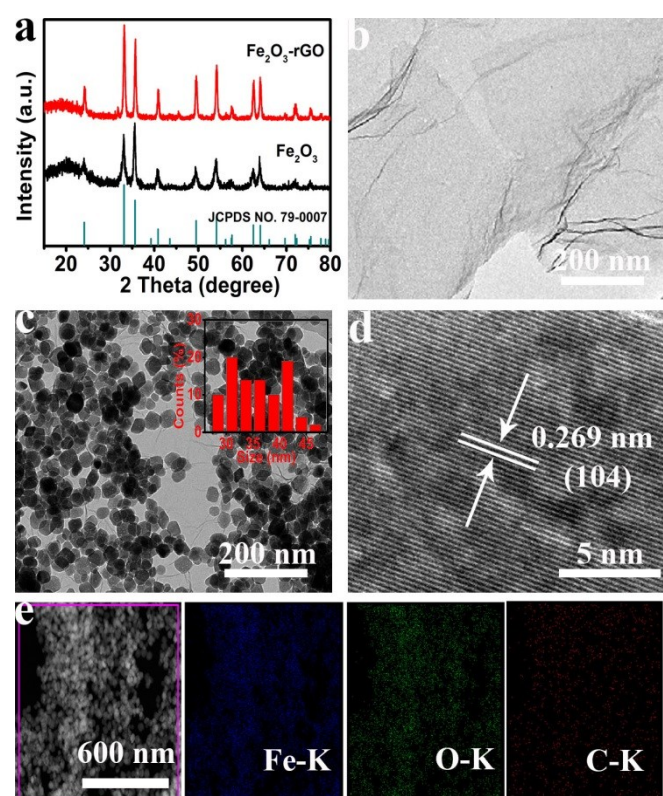

Fig. 1. (a) XRD patterns for  $\text{Fe}_2\text{O}_3$  and  $\text{Fe}_2\text{O}_3$ -rGO. TEM images of (b) rGO and (c)  $\text{Fe}_2\text{O}_3$ -rGO (inset: the particle size distribution of  $\text{Fe}_2\text{O}_3$ ). (d) HRTEM image taken from  $\text{Fe}_2\text{O}_3$ -rGO. (e) STEM and corresponding EDX elemental mapping images of Fe, O, and C elements for  $\text{Fe}_2\text{O}_3$ -rGO.

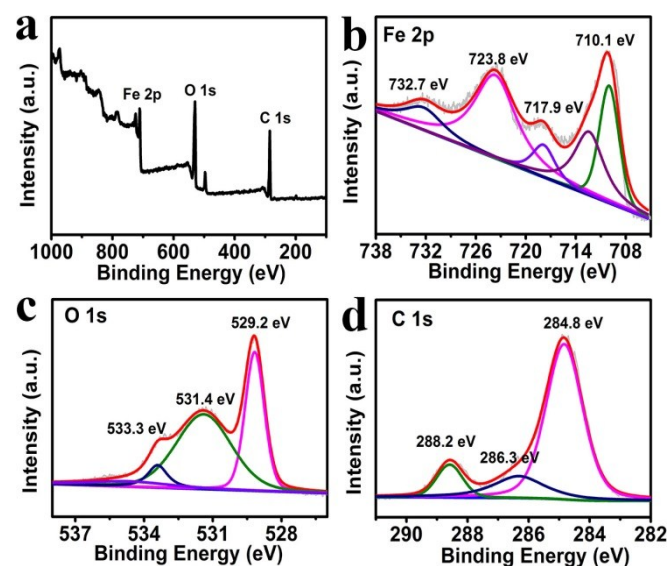

Fig. 2. (a) XPS survey spectrum for  $\text{Fe}_2\text{O}_3$ -rGO. XPS spectra of  $\text{Fe}_2\text{O}_3$ -rGO in the (b) Fe 2p, (c) O 1s, and (d) C 1s regions.

Fig. 2a exhibits the X-ray photoelectron spectroscopy (XPS) survey spectrum of  $\text{Fe}_2\text{O}_3$ -rGO, further indicating the presence of Fe, O, and C elements. XPS spectrum for Fe 2p shown in Fig. 2b exhibits two major peaks with binding energies (BEs) at 710.1 and 723.8 eV, corresponding to Fe 2p<sub>3/2</sub> and Fe 2p<sub>1/2</sub>, respectively, which is characteristic of Fe<sup>3+</sup> in  $\text{Fe}_2\text{O}_3$ .<sup>47,48</sup> Moreover, two shake-up satellites at 717.9 and 732.7 eV are the fingerprint of the electronic structure of  $\text{Fe}_2\text{O}_3$ . In the O 1s region (Fig. 2c), the BEs at 529.2 and 531.4 eV are assigned to

O<sup>2-</sup> and C–O, respectively.<sup>49</sup> In the C 1s region (Fig. 2d), the peak at 284.8 eV reflects the sp<sup>2</sup>-hybridized carbon. The peaks at 284.8 and 288.2 eV are attributed to the C–O and carboxylate carbon in O=C–OH, respectively, which are the possible interaction sites between  $\text{Fe}_2\text{O}_3$ /rGO. That is also the main reason why  $\text{Fe}_2\text{O}_3$  can be well contacted with rGO.<sup>50,51</sup>

Electrochemical measurements of  $\text{Fe}_2\text{O}_3$ -rGO (loaded on carbon paper,  $\text{Fe}_2\text{O}_3$ -rGO/CP loading: 0.2 mg cm<sup>-2</sup>) were carried out in 0.5 M LiClO<sub>4</sub> in an H-shape electrochemical cell. All potentials for NRR were reported on a RHE scale. The concentration of NH<sub>3</sub> and possible N<sub>2</sub>H<sub>4</sub> by-product hydrazine were spectrophotometrically determined by the indophenol blue method<sup>52</sup> and Watt and Chrisp, respectively.<sup>53</sup> Fig. S2 and S3 display the corresponding calibration curves. Chronoamperometry experiments were firstly performed for 2h at the potentials ranging from –0.35 to –0.55 V, as shown in Fig. 3a. The produced NH<sub>3</sub> was then measured and related UV-Vis absorption spectra are shown in Fig. 3b.

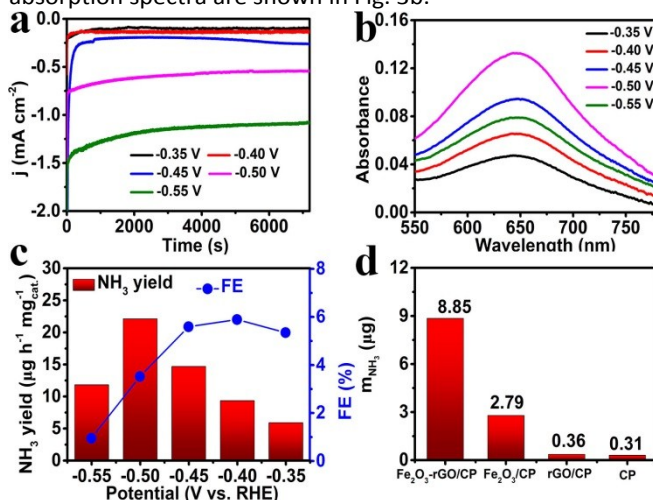

Fig. 3. (a) Time-dependent current density curves for  $\text{Fe}_2\text{O}_3$ -rGO/CP at different potentials in 0.5 M LiClO<sub>4</sub>. (b) UV-Vis absorption spectra of the electrolytes stained with indophenol indicator at a series of potentials. (c) NH<sub>3</sub> yields and FEs for  $\text{Fe}_2\text{O}_3$ -rGO/CP at different potentials in 0.5 M LiClO<sub>4</sub>. (d) Amount of NH<sub>3</sub> generated with different electrodes at –0.50 V after 2 h electrolysis.

NH<sub>3</sub> yields and FEs at various potentials are plotted in Fig. 3c. Obviously,  $\text{Fe}_2\text{O}_3$ -rGO/CP achieves the largest NH<sub>3</sub> yield of 22.13  $\mu\text{g h}^{-1} \text{mg}^{-1} \text{cat.}$  at –0.50 V and the highest FE of 5.89% at –0.40 V, comparing favourably to the behaviours of most Fe-based materials and most other TMOs in aqueous media (Table S1). Moreover, NH<sub>3</sub> yields increases while FEs decrease in the potential ranging of –0.35 V to –0.50 V, which could be attributed to the compromise between increasing current density and competitive selectivity toward hydrogen evolution reaction (HER) rather than NRR. When the applied potential is below –0.50 V, both NH<sub>3</sub> yields and FEs decrease significantly due to the competing hydrogen evolution reaction.<sup>14,28</sup> Note that N<sub>2</sub>H<sub>4</sub> was not detected in the electrolytes (Fig. S4), implying  $\text{Fe}_2\text{O}_3$ -rGO/CP has excellent selectivity for NRR. It should be pointed out that rGO/CP and bare CP show poor catalytic activity (Fig. 3d). In sharp contrast, the amount of NH<sub>3</sub> generated for  $\text{Fe}_2\text{O}_3$ -rGO/CP (8.85  $\mu\text{g}$ ) is much higher than that of  $\text{Fe}_2\text{O}_3$ /CP (2.79  $\mu\text{g}$ ). Such superior NRR performance for  $\text{Fe}_2\text{O}_3$ -rGO/CP can be rationally attributed to the following two reasons. (1)  $\text{Fe}_2\text{O}_3$ -rGO has larger surface area (Fig. S5) and thus

exposes more active sites for NRR catalysis;<sup>54</sup> (2) electrochemical impedance spectroscopy data (Fig. S6) show that Fe<sub>2</sub>O<sub>3</sub>-rGO possesses a lower charge transfer resistance and thus faster NRR kinetics. We also performed electrolysis in 0.1 M LiClO<sub>4</sub> at -0.50 V. As shown in Fig. S7, this catalyst performs more efficiently in 0.5 M LiClO<sub>4</sub>.

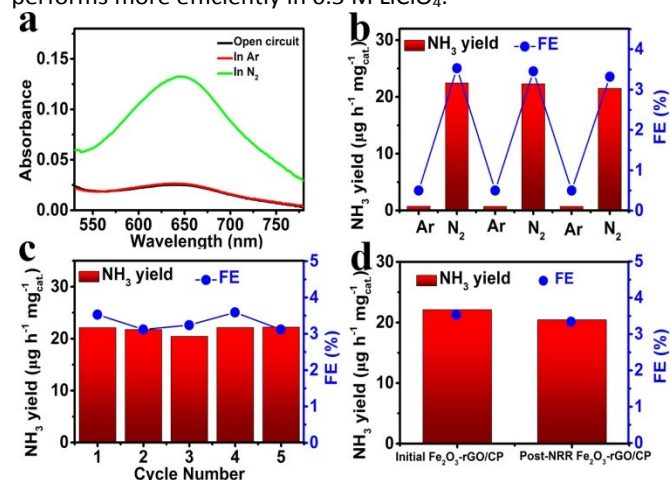

**Fig. 4.** (a) UV-Vis absorption spectra of the electrolytes stained with indophenol indicator after 2 h electrolysis at -0.50 V under different electrochemical conditions. (b) NH<sub>3</sub> yields and FEs of Fe<sub>2</sub>O<sub>3</sub>-rGO/CP at -0.50 V with alternating at the interval of 2 h cycles between Ar-saturated and N<sub>2</sub>-saturated electrolytes. (c) Recycling test at -0.50 V for Fe<sub>2</sub>O<sub>3</sub>-rGO/CP. (d) NH<sub>3</sub> yields and FEs at -0.50 V for 2 h over initial Fe<sub>2</sub>O<sub>3</sub>-rGO/CP and Fe<sub>2</sub>O<sub>3</sub>-rGO/CP subjected to 24-h operation.

To ensure that the detected NH<sub>3</sub> originates from the NRR process by Fe<sub>2</sub>O<sub>3</sub>-rGO/CP, we performed two control experiments in N<sub>2</sub>-saturated solution under open circuit potential and Ar-saturated solution at -0.50 V. In these experiments, only trace NH<sub>3</sub> could be detected by the UV-vis measurements (Fig. 4a). NRR performance of Fe<sub>2</sub>O<sub>3</sub>-rGO/CP was also tested alternately at -0.50 V in Ar-saturated and N<sub>2</sub>-saturated 0.5 M LiClO<sub>4</sub>. As this result shows, NH<sub>3</sub> is only produced under N<sub>2</sub> atmosphere (Fig. 4b). All data ensure that the detected NH<sub>3</sub> originates from the NRR process by Fe<sub>2</sub>O<sub>3</sub>-rGO/CP. Stability is another critical parameter to evaluate catalyst performance. As shown in Fig. 4c, both NH<sub>3</sub> yields and FEs are well maintained after 5 times of consecutive recycling (Fig. S8). Moreover, 24h electrolysis for Fe<sub>2</sub>O<sub>3</sub>-rGO/CP at -0.50 V (Fig. S9) shows that the current densities remain almost constant for 24 h. We further determined the NRR performance after 2-h NRR test at -0.50 V in fresh N<sub>2</sub>-saturated electrolyte using Fe<sub>2</sub>O<sub>3</sub>-rGO/CP that has already electrolyzed for 24 h. As shown in Fig. S10 and Fig. 4d, NH<sub>3</sub> yield and FE have negligible change, suggesting Fe<sub>2</sub>O<sub>3</sub>-rGO/CP has good electrochemical stability for the NRR. In addition, XRD analysis (Fig. S11) demonstrate that such an electrocatalyst is still the Fe<sub>2</sub>O<sub>3</sub>-rGO in nature after stability test. TEM image (Fig. S12) further shows that Fe<sub>2</sub>O<sub>3</sub>-rGO keeps its initial morphology after the NRR test.

In summary, Fe<sub>2</sub>O<sub>3</sub>-rGO composite is reported as an earth-abundant NRR electrocatalyst enabling efficient ambient N<sub>2</sub>-to-NH<sub>3</sub> conversion. In 0.5 M LiClO<sub>4</sub>, Fe<sub>2</sub>O<sub>3</sub>-rGO/CP achieves a large NH<sub>3</sub> yield of 22.13 μg h<sup>-1</sup> mg<sub>cat.</sub><sup>-1</sup> at -0.50 V and a high FE of 5.89% at -0.40 V. Notably, it also exhibits excellent selectivity for NH<sub>3</sub> synthesis with good electrochemical stability. This study not only offers us an attractive catalyst material based on earth-abundant elements for ambient electrochemical NH<sub>3</sub> synthesis,

but would open up an exciting new avenue to the rational design of graphene-based nanocatalysts for artificial N<sub>2</sub> fixation.

## Acknowledgement

This work was supported by the National Natural Science Foundation of China (No. 21575137).

## Conflicts of interest

There are no conflicts to declare.

## References

- 1 A. F. Bouwman and K. W. Van Der Hoek, *Atmos. Environ.*, 1997, **31**, 4095–4102.
- 2 J. N. Renner, L. F. Greenlee, K. E. Ayres and A. M. Herring, *Electrochem. Soc. Interface*, 2015, **24**, 51–57.
- 3 I. Dybkjaer, *Ammonia Production Processes* (Ed.: A. Nielsen), Springer, Heidelberg, 1995, pp. 199–327.
- 4 M. A. Shipman and M. D. Symes, *Catal. Today*, 2017, **286**, 57–68.
- 5 V. Rosca, M. Duca, M. T. de Groot and M. T. M. Koper, *Chem. Rev.*, 2009, **109**, 2209–2244.
- 6 C. Guo, J. Ran, A. Vasileff and S. Qiao, *Energy Environ. Sci.*, 2018, **11**, 45–56.
- 7 S. Gao, Y. Zhu, Y. Chen, M. Tian, Y. Yang, T. Jiang and Z. Wang, *Mater. Today*, 2019, DOI: 10.1016/j.mattod.2019.05.004.
- 8 R. Zhao, H. Xie, L. Chang, X. Zhang, X. Zhu, X. Tong, T. Wang, Y. Luo, P. Wei, Z. Wang and X. Sun, *EnergyChem*, 2019, DOI: 10.1016/j.enchem.2019.100011.
- 9 M. Shi, D. Bao, B. R. Wulan, Y. Li, Y. Zhang, J. Yan and Q. Jiang, *Adv. Mater.*, 2017, **29**, 1606550.
- 10 H. Huang, L. Xia, X. Shi, A. M. Asiri and X. Sun, *Chem. Commun.*, 2018, **54**, 11427–11430.
- 11 J. Wang, L. Yu, L. Hu, G. Chen, H. Xin and X. Feng, *Nat. Commun.*, 2018, **9**, 1795.
- 12 V. Kordali, G. Kyriacou and C. Lambrou, *Chem. Commun.*, 2000, **17**, 1673–1674.
- 13 C. Lv, Y. Qian, C. Yan, Y. Ding, Y. Liu, G. Chen and G. Yu, *Angew. Chem., Int. Ed.*, 2018, **57**, 10246–10250.
- 14 X. Ren, J. Zhao, Q. Wei, Y. Ma, H. Guo, Q. Liu, Y. Wang, G. Cui, A. M. Asiri, B. Li, B. Tang and X. Sun, *ACS Cent. Sci.*, 2019, **5**, 116–121.
- 15 Z. Wang, F. Gong, L. Zhang, R. Wang, L. Ji, Q. Liu, Y. Luo, H. Guo, Y. Li, P. Gao, X. Shi, B. Li, B. Tang and X. Sun, *Adv. Sci.*, 2018, **5**, 1801182.
- 16 S. Chen, S. Perathoner, C. Ampelli, C. Mebrahtu, D. Su and G. Centi, *Angew. Chem., Int. Ed.*, 2017, **56**, 2699–2703.
- 17 J. Zhao, L. Zhang, X.-Y. Xie, X. Li, Y. Ma, Q. Liu, W.-H. Fang, X. Shi, G. Cui and X. Sun, *J. Mater. Chem. A*, 2018, **6**, 24031–24035.
- 18 H. Cheng, L. Ding, G. Chen, L. Zhang, J. Xue and H. Wang, *Adv. Mater.*, 2018, **30**, 1803694.
- 19 L. Li, C. Tang, B. Xia, H. Jin, Y. Zheng and S. Qiao, *ACS Catal.*, 2019, **9**, 2902–2908.
- 20 L. Yang, T. Wu, R. Zhang, H. Zhou, L. Xia, X. Shi, H. Zheng, Y. Zhang and X. Sun, *Nanoscale*, 2019, **11**, 1555–1562.
- 21 R. Zhang, J. Han, B. Zheng, X. Shi, A. M. Asiri and X. Sun, *Inorg. Chem. Front.*, 2019, **6**, 391–395.
- 22 J. Kong, A. Lim, C. Yoon, J. H. Jang, H. C. Ham, J. Han, S. Nam, D. Kim, Y. Sung, J. Choi and H. S. Park, *ACS Sustainable Chem. Eng.*, 2017, **5**, 10986–10995.
- 23 Y. Liu, Y. Su, X. Quan, X. Fan, S. Chen, H. Yu, H. Zhao, Y. Zhang and J. Zhao, *ACS Catal.*, 2018, **8**, 1186–1191.



- 24 S. Zhang, C. Zhao, Y. Liu, W. Li, J. Wang, G. Wang, Y. Zhang, H. Zhang and H. Zhao, *Chem. Commun.*, 2019, **55**, 2952–2955.
- 25 Y. Zhang, H. Du, Y. Ma, L. Ji, H. Guo, Z. Tian, H. Chen, H. Huang, G. Cui, A. M. Asiri, F. Qu, L. Chen and X. Sun, *Nano Res.*, 2019, **12**, 919–924.
- 26 R. Zhang, L. Ji, W. Kong, H. Wang, R. Zhao, H. Chen, T. Li, B. Li, Y. Luo and X. Sun, *Chem. Commun.*, 2019, **55**, 5263–5266.
- 27 X. Zhu, H. Wang, Z. Liu, R. Zhao, H. Chen, T. Wang, F. Wang, Y. Luo, Y. Wu and X. Sun, *Chem. Commun.*, 2019, **55**, 3987–3990.
- 28 J. Yu, C. Li, B. Li, X. Zhu, R. Zhang, L. Ji, D. Tang, A. M. Asiri, X. Sun, Q. Li, S. Liu, Y. Luo, *Chem. Commun.*, 2019, **55**, 6401–6404.
- 29 W. Li, T. Wu, S. Zhang, Y. Liu, C. Zhao, G. Liu, G. Wang, H. Zhang and H. Zhao, *Chem. Commun.*, 2018, **54**, 11188–11191.
- 30 H. Chen, X. Zhu, H. Huang, H. Wang, T. Wang, R. Zhao, H. Zheng, A. M. Asiri, Y. Luo and X. Sun, *Chem. Commun.*, 2019, **55**, 3152–3155.
- 31 T. Wang, L. Xia, J. Yang, H. Wang, W. Fang, H. Chen, D. Tang, A. M. Asiri, Y. Luo, G. Cui and X. Sun, *Chem. Commun.*, 2019, **55**, 7502–7505.
- 32 J. Zhao, B. Wang, Q. Zhou, H. Wang, X. Li, H. Chen, Q. Wei, D. Wu, Y. Luo, J. You, F. Gong and X. Sun, *Chem. Commun.*, 2019, **55**, 4997–5000.
- 33 W. Guo, Z. Liang, J. Zhao, B. Zhu, K. Cai, R. Zou and Q. Xu, *Small Methods*, 2018, **2**, 1800204.
- 34 X. Zhang, T. Wu, H. Wang, R. Zhao, H. Chen, T. Wang, P. Wei, Y. Luo, Y. Zhang and X. Sun, *ACS Catal.*, 2019, **9**, 4609–4615.
- 35 Y. Liu, M. Han, Q. Xiong, S. Zhang, C. Zhao, W. Gong, G. Wang, H. Zhang and H. Zhao, *Adv. Energy Mater.*, 2019, **9**, 1803935.
- 36 H. Huang, F. Gong, Y. Wang, H. Wang, X. Wu, W. Lu, R. Zhao, H. Chen, X. Shi, A. M. Asiri, T. Li, Q. Liu and X. Sun, *Nano Res.*, 2019, **12**, 1093–1098.
- 37 X. Li, X. Ren, X. Liu, J. Zhao, X. Sun, Y. Zhang, X. Kuang, T. Yan, Q. Wei and D. Wu, *J. Mater. Chem. A*, 2019, **7**, 2524–2528.
- 38 X. Li, L. Li, X. Ren, D. Wu, Y. Zhang, H. Ma, X. Sun, B. Du, Q. Wei and B. Li, *Ind. Eng. Chem. Res.*, 2018, **57**, 16622–16627.
- 39 X. Ren, G. Cui, L. Chen, F. Xie, Q. Wei, Z. Tian and X. Sun, *Chem. Commun.*, 2018, **54**, 8474–8477.
- 40 T. M. Buscagan, P. H. Oyala and J. C. Peters, *Angew. Chem., Int. Ed.*, 2017, **129**, 7025–7030.
- 41 P. Jiang, Q. Liu, Y. Liang, J. Tian, A. M. Asiri and X. Sun, *Angew. Chem., Int. Ed.*, 2014, **126**, 13069–13073.
- 42 S. Licht, B. Cui, B. Wang, F. Li, J. Lau and S. Liu, *Science*, 2014, **345**, 637–640.
- 43 S. Chen, S. Perathoner, C. Ampelli, C. Mebrahtu, D. Su and G. Centi, *ACS Sustainable Chem. Eng.*, 2017, **5**, 7393–7400.
- 44 X. Xiang, Z. Wang, X. Shi, M. Fan and X. Sun, *ChemCatChem*, 2018, **10**, 4530–4535.
- 45 X. Cui, C. Tang, X. Liu, C. Wang, W. Ma and Q. Zhang, *Chem. Eur. J.*, 2018, **24**, 18494–18501.
- 46 Q. Liu, X. Zhang, B. Zhang, Y. Luo, G. Cui, F. Xie and X. Sun, *Nanoscale*, 2018, **10**, 14386–14389.
- 47 B. Xu, X. Guan, L. Y. Zhang, X. Liu, Z. Jiao, X. Liu, X. Hu and X. Zhao, *J. Mater. Chem. A*, 2018, **6**, 4048–4054.
- 48 G. Sun, B. Dong, M. Cao, B. Wei and C. Hu, *Chem. Mater.*, 2011, **23**, 1587–1593.
- 49 Y. Zhu, S. Cheng, W. Zhou, J. Jia, L. Yang, M. Yao, M. Wang, J. Zhou, P. Wu and M. Liu, *ACS Sustainable Chem. Eng.*, 2017, **5**, 5067–5074.
- 50 Z. Shen, H. Xing, Y. Zhu, X. Ji, Z. Liu and L. Wang, *J. Mater. Sci.: Mater. Electron.*, 2017, **28**, 13896–13904.
- 51 L. Guo, X. Kou, M. Ding, C. Wang, L. Dong, H. Zhang, C. Feng, Y. Sun, Y. Gao and P. Sun, *Sens. Actuators, B*, 2017, **244**, 233–242.
- 52 D. Zhu, L. Zhang, R. E. Ruther and R. J. Hamers, *Nat. Mater.*, 2013, **12**, 836–841.
- 53 G. W. Watt and J. D. Chrisp, *Anal. Chem.*, 1952, **24**, 2006–2008.
- 54 J. Zhao, X. Ren, X. Li, D. Fan, X. Sun, H. Ma, Q. Wei and D. Wu, *Nanoscale*, 2019, **11**, 4231–4235.
